# Supplementary material for: Use of Nickel Oxide Catalysts (Bunsenites) for In-Situ Hydrothermal Upgrading Process of Heavy Oil
Source: MDPI journal article supplement (doi:10.3390/nano13081351), 2023-04-12
Supplement: s1 [file s1]

# Use of Nickel Oxide Catalysts (Bunsenites) for In-Situ Hydrothermal Upgrading Process of Heavy Oil

Jiménez Padilla Pedro Alonso <sup>1</sup>, Richard Djimasbe <sup>1,\*</sup>, Rustem Zairov <sup>2,3</sup>, Chengdong Yuan <sup>1</sup>, Ameen A. Al-Muntaser <sup>1</sup>, Alexey Stepanov <sup>3</sup>, Guliya Nizameeva <sup>4</sup>, Alexey Dovzhenko <sup>2,3</sup>, Muneer A. Suwaid <sup>1</sup>, Mikhail A. Varfolomeev <sup>1,2,\*</sup> and Almaz L. Zinnatullin <sup>5</sup>

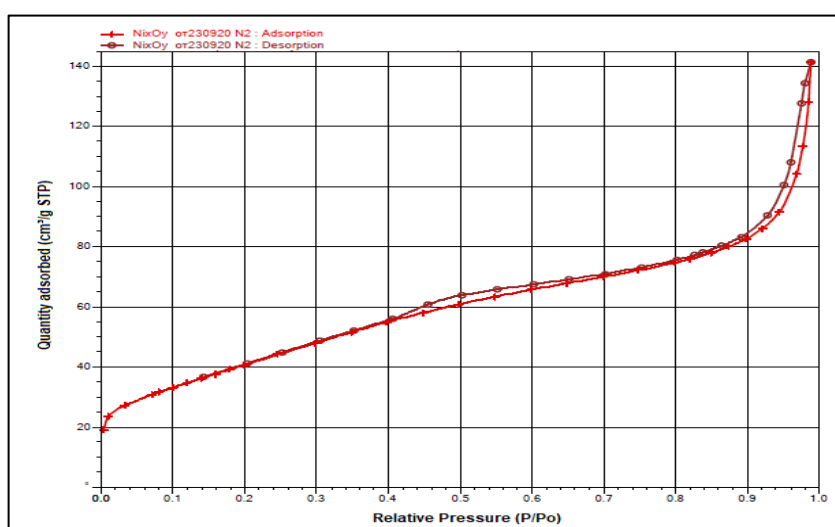

Figure S1. Isotherm linear plot of adsorption and desorption of catalyst-1.

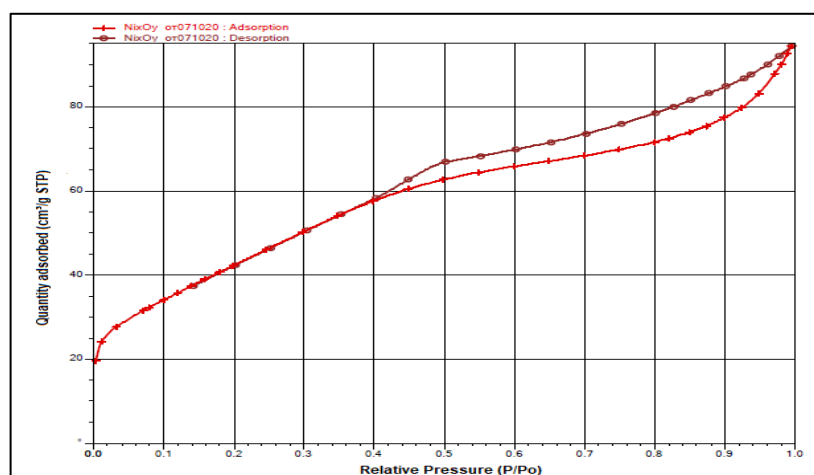

Figure S2. Isotherm linear plot of adsorption and desorption of catalyst-2.

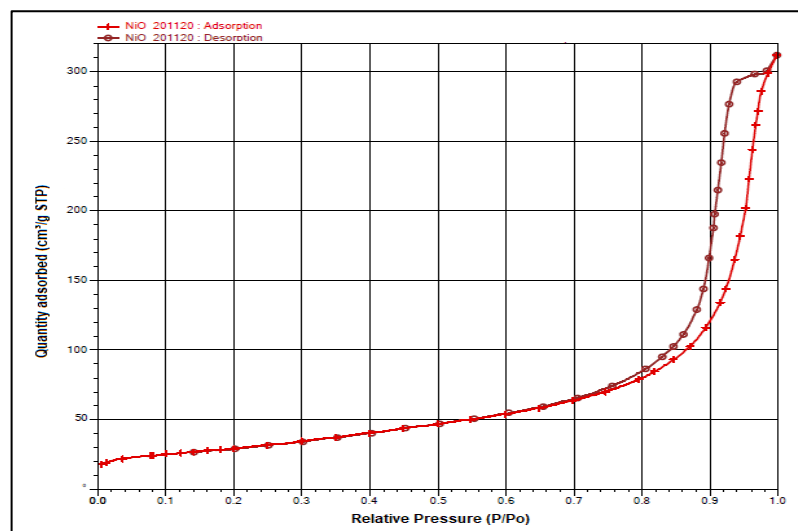

**Figure S3.** Isotherm of adsorption and desorption of catalyst-3.

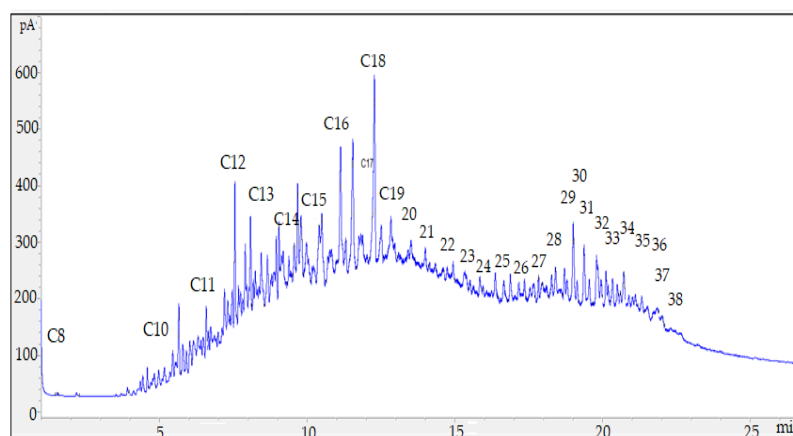

**Figure S4.** Chromatogram of saturate fractions of heavy crude oil.

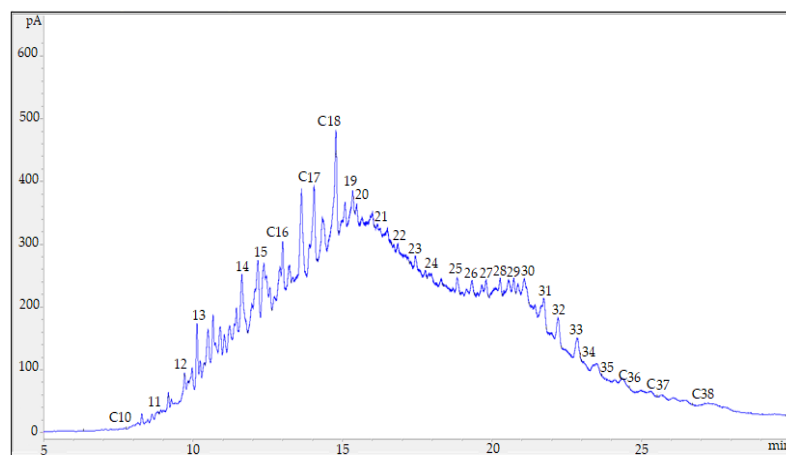

**Figure S5.** Chromatogram of saturate fractions of upgraded oil +steam.

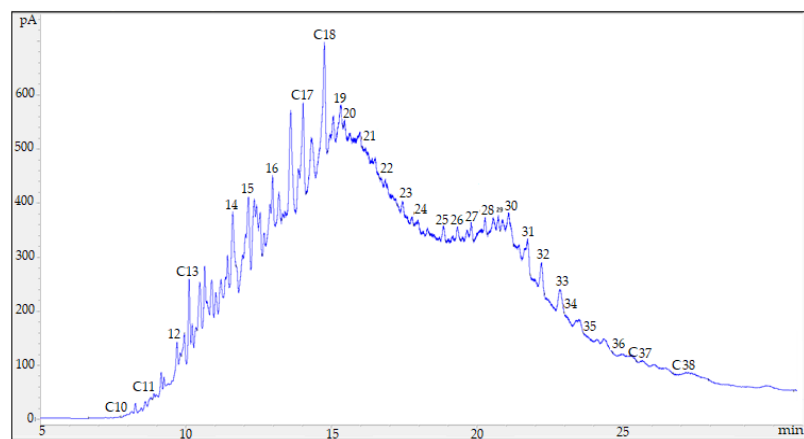

**Figure S6.** Chromatogram of saturate fractions of upgraded oil + catalyst-1.

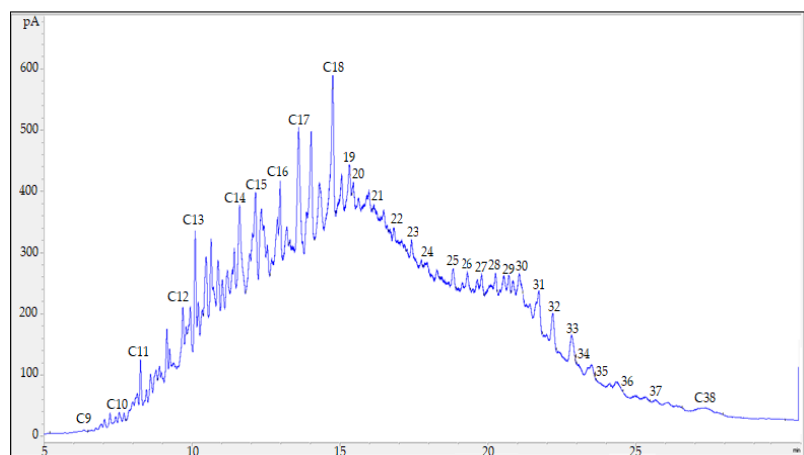

**Figure S7.** Chromatogram of saturate fractions of upgraded oil + catalyst-2.

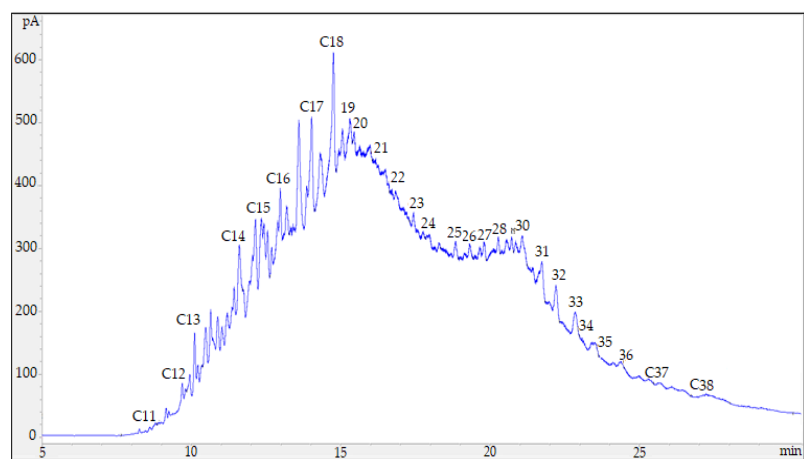

**Figure S8.** Chromatogram of saturate fractions of upgraded oil + catalyst-3.
